# Supplementary material for: Liquid-crystalline elastomer micropillar array for haptic actuation
Source: Royal Society of Chemistry journal article supplement (doi:10.1039/c3tc31109k), 2013-01-01
Supplement: c3tc31109k.pdf [file c3tc31109k.pdf]

# Liquid-Crystalline Elastomer Micropillar Array for Haptic Actuation

**Núria Torras,<sup>a,b</sup> Kirill E. Zinoviev,<sup>‡a</sup> Jaume Esteve<sup>\*a</sup> and  
Antoni Sánchez-Ferrer<sup>\*c</sup>**

<sup>a</sup> *Instituto de Microelectrónica de Barcelona, IMB-CNM (CSIC), Campus UAB, Bellaterra, E-08193 Barcelona, Spain. E-mail: [jaume.esteve@imb-cnm.csic.es](mailto:jaume.esteve@imb-cnm.csic.es)*

<sup>b</sup> *Departament de Microelectrònica i Sistemes Electrònics, Universitat Autònoma de Barcelona, Campus UAB, Bellaterra E-08193 Barcelona, Spain.*

<sup>c</sup> *ETH Zurich, Department of Health Sciences & Technology, Institute of Food, Nutrition & Health, Food & Soft Materials Science Group, Schmelzbergstrasse 9, CH-8092 Zurich, Switzerland. E-mail: [antoni.sanchez@hest.ethz.ch](mailto:antoni.sanchez@hest.ethz.ch)*

<sup>‡</sup> *Present address: Medlumics SL, Ronda de Poniente 16 1E, 28760 Tres Cantos, Madrid, Spain.*

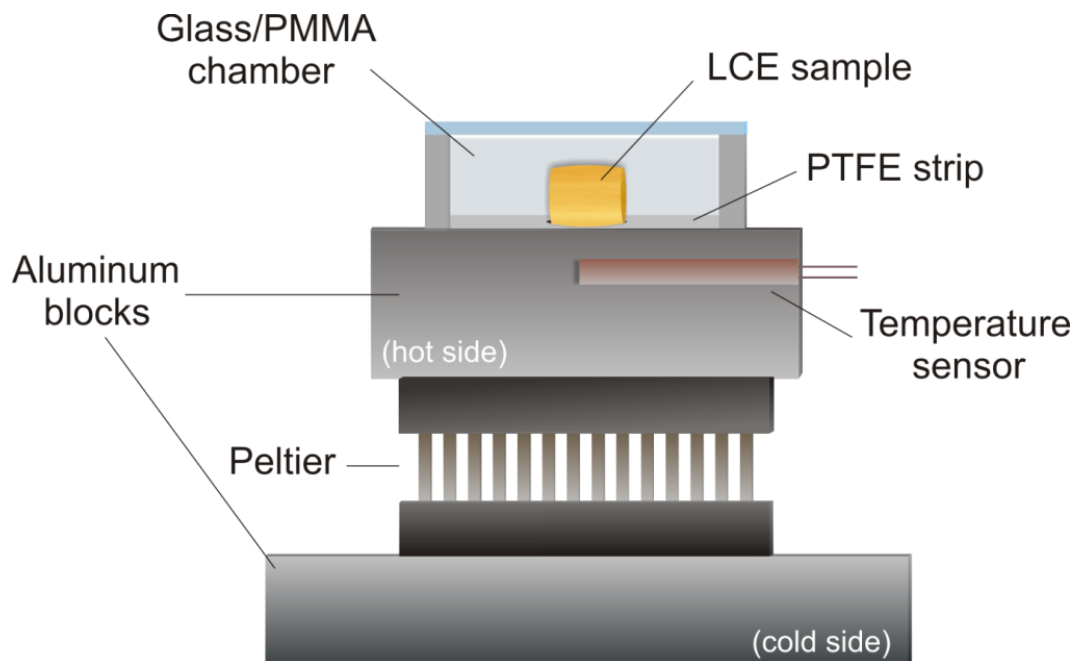

**Fig. ESI-1.** Setup for the thermoelastic experiment.

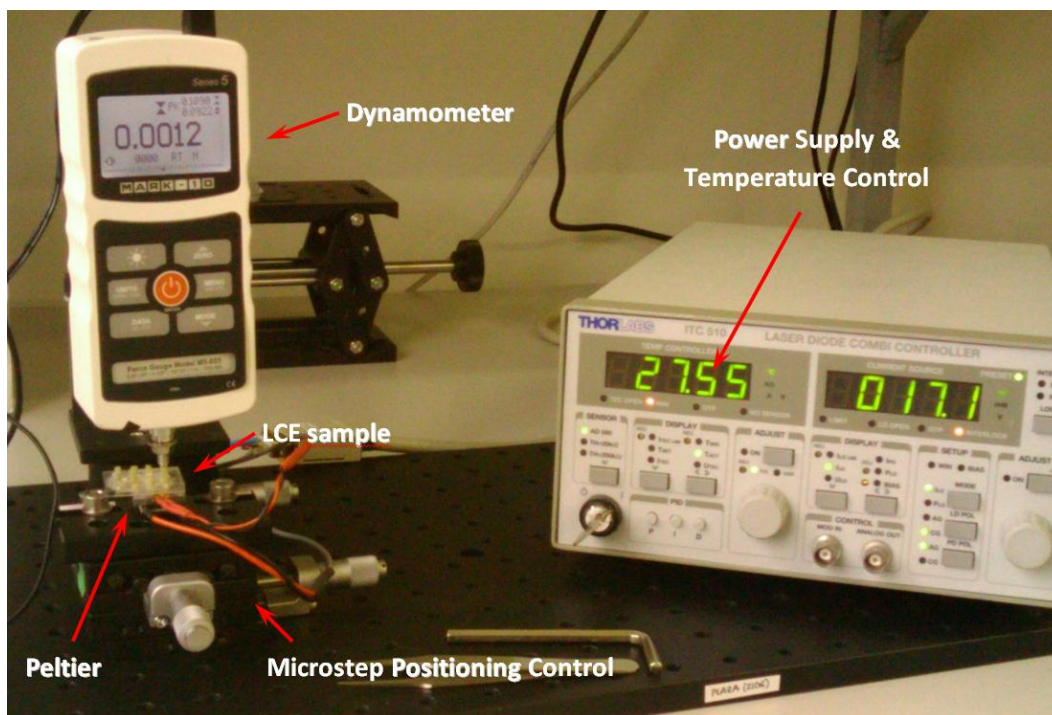

**Fig. ESI-2.** Setup for the evaluation of the mechanical actuation.

Swelling experiments on the partially crosslinked non-oriented micropillar ( $P_{\text{pcno}}$ ), on the fully crosslinked non-oriented micropillar ( $P_{\text{cno}}$ ), and on the fully crosslinked oriented micropillar ( $P_{\text{co}}$ ) were performed in toluene at 25 °C in order to obtain information about the crosslinking process and the orientation of the sample. The swelling parameter  $q = \alpha_r^2 \alpha_z$  for the  $P_{\text{co}}$  micropillar ( $q = 4.2 \pm 0.3$ ) was similar to the  $P_{\text{cno}}$  micropillar ( $q = 4.1 \pm 0.3$ ), but lower than for the  $P_{\text{pcno}}$  micropillar ( $q = 5.4 \pm 0.5$ ). These values confirmed the difference in crosslinking density between the partially crosslinked elastomer,  $P_{\text{pcno}}$  with high swelling ratio, and the fully crosslinked elastomers,  $P_{\text{co}}$  and  $P_{\text{cno}}$  with low swelling ratio. Moreover, the anisotropy of the network could be described from the swelling anisotropy  $q_z = \alpha_z / \alpha_r$ , which is the ratio between the axial swelling ratio  $\alpha_z$  and the radial swelling ratio  $\alpha_r$ . The oriented micropillar  $P_{\text{co}}$  showed a swelling anisotropy of  $q_z = 1.09 \pm 0.04$ , which differed from the random distribution of nematic domains in the micropillars  $P_{\text{pcno}}$  and  $P_{\text{cno}}$  with swelling anisotropy values of  $q_z = 1.00 \pm 0.06$  and  $q_z = 1.00 \pm 0.05$ , respectively (Fig. ESI-3).

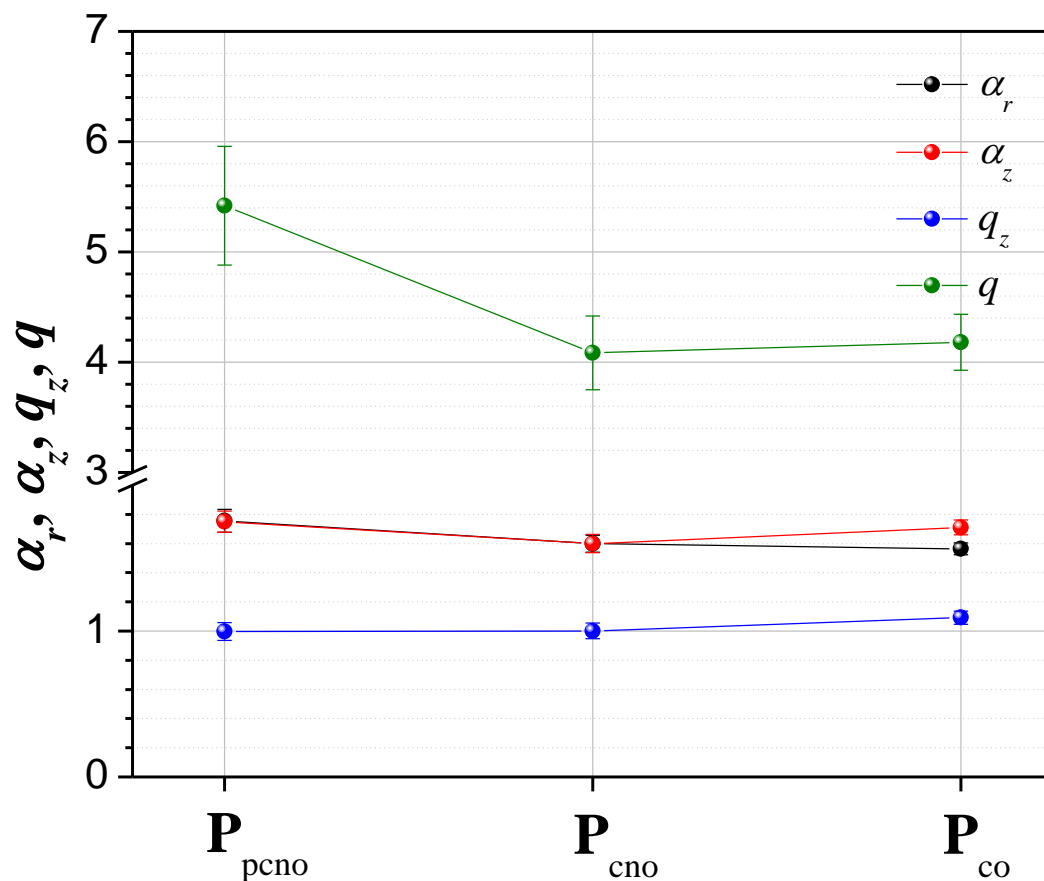

**Fig. ESI-3.** Swelling ratios  $\alpha_r$  and  $\alpha_z$ , swelling anisotropy  $q_z$  and swelling parameter  $q$  for the partially crosslinked non-oriented micropillar ( $P_{pcno}$ ), the fully crosslinked non-oriented micropillar ( $P_{cno}$ ), and the fully crosslinked oriented micropillar ( $P_{co}$ ) in toluene at 25 °C.
